# Supplementary material for: Global Transcriptional Dynamics of Diapause Induction in Non-Blood-Fed and Blood-Fed Aedes albopictus
Source: PLoS Negl Trop Dis. 2015 Apr 21;9(4):e0003724. doi: 10.1371/journal.pntd.0003724 (PMC4405372; doi:10.1371/journal.pntd.0003724)
Supplement: S1 Table — (XLSX) [file pntd.0003724.s004.xlsx]

## Sheet: TableS1
Table S1 Diapause incidence measurement for the temperate population used in this study
Treatment	Replicate-Gonotrophic cycle	No. of eggs from 1st hatch	No. of eggs from 2nd hatch	No. of embryonated, unhatched eggs	% Diapause
LD	1-1	295	1	2
LD	1-2	48	4	8
Pooled		343	5	10	0.027933
LD	2-1	219	2	5
LD	2-2	277	1	12
Pooled		496	3	17	0.0329457
LD	3-1	62	5	2
LD	3-2	136	0	1
Pooled		198	5	3	0.0145631
SD	1-1	14	0	168
SD	1-2	10	0	139
Pooled		24	0	307	0.927492
SD	2-1	34	0	626
SD	2-2	9	0	164
Pooled		43	0	790	0.948379
SD	3-1	7	0	27
SD	3-2	53	0	236
Pooled		60	0	263	0.814241
